# Supplementary material
Source: PubMed Central journal article supplement (PMC3879984)
Supplement: supp_evt198_Ferreira_Chimps_GBE_SFig_FINAL.pdf [file supp_evt198_Ferreira_Chimps_GBE_SFig_FINAL.pdf]

Sequence diversity of *Pan troglodytes* subspecies and the impact of *WFDC6* selective constraints in reproductive immunity.

Zélia Ferreira, Belen Hurle, Aida M. Andrés, Warren Kretzschmar, Jim Mullikin  
Praveen Cherukuri, Pedro Cruz, Mary Katherine Gonder, Anne Stone, Sarah Tishkoff,  
Willie Swanson, NISC Comparative Sequencing Program, Eric Green, Andrew G.  
Clark, and Susana Seixas.

Supplementary Figures

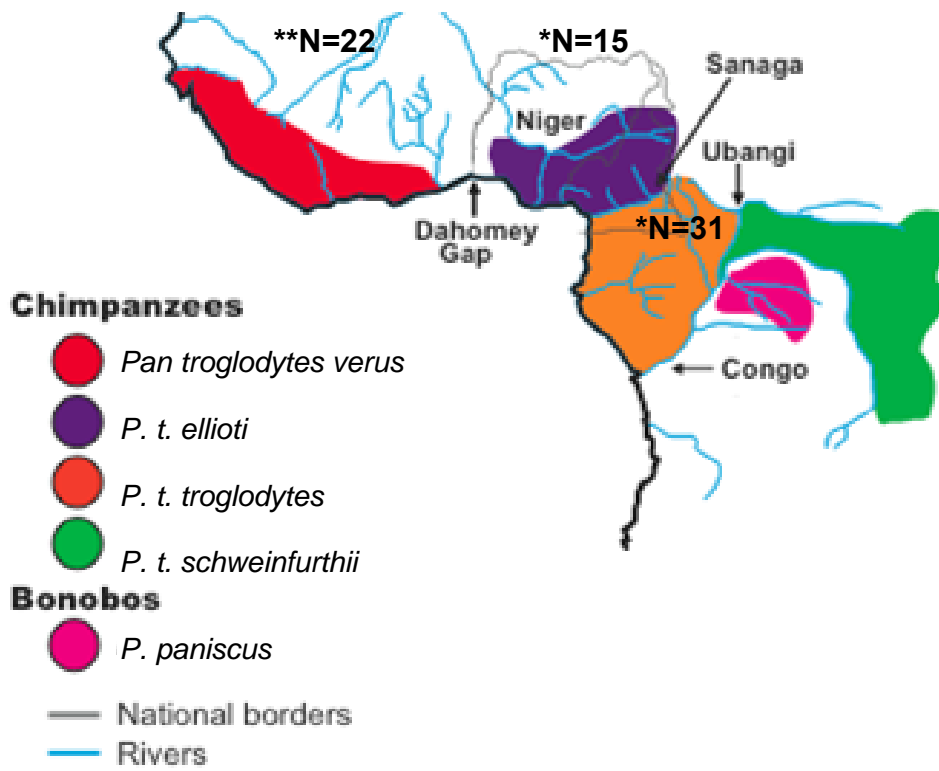

Supplementary Figure S1: Geographic distribution of *P. troglodytes* subspecies in Africa (adapted from Gonder et al. 2011 (Gonder, et al. 2011)).

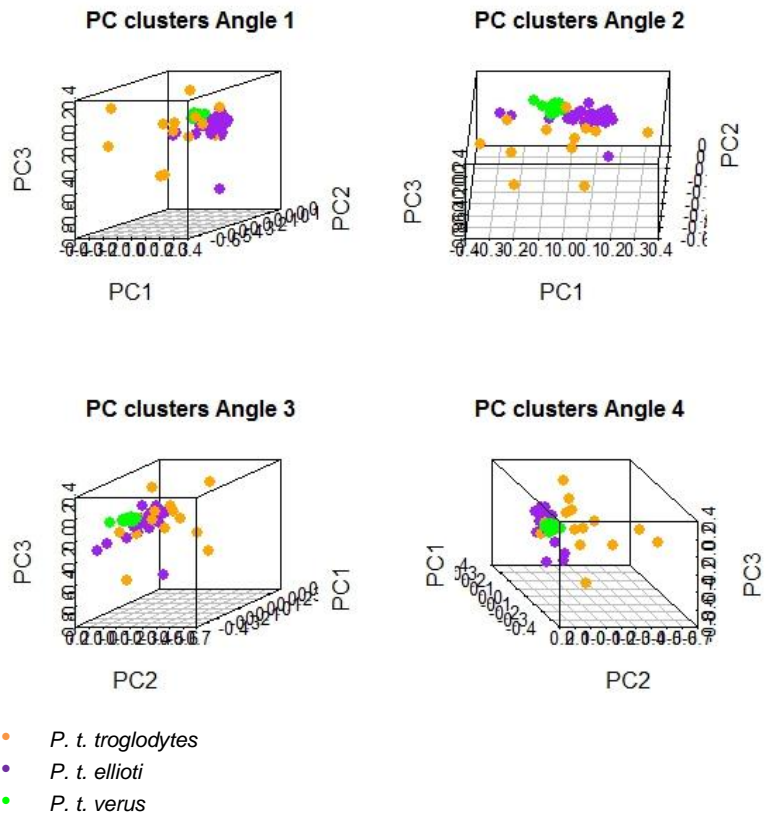

Supplementary Figure S2: PCA plots of 419 SNPs in the control regions. Eigen values were calculated in eigenstrat and plots were made using R (Patterson, et al. 2006).

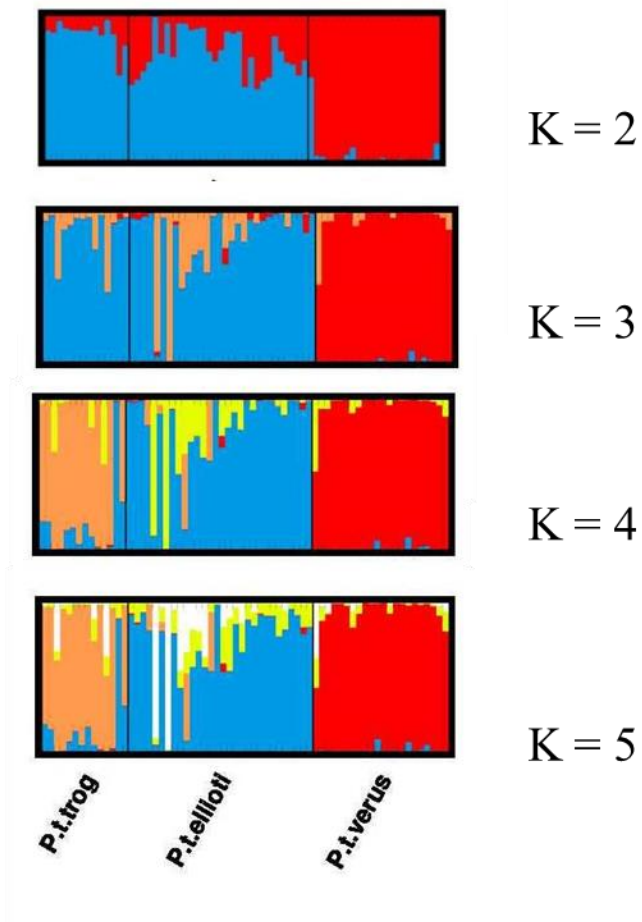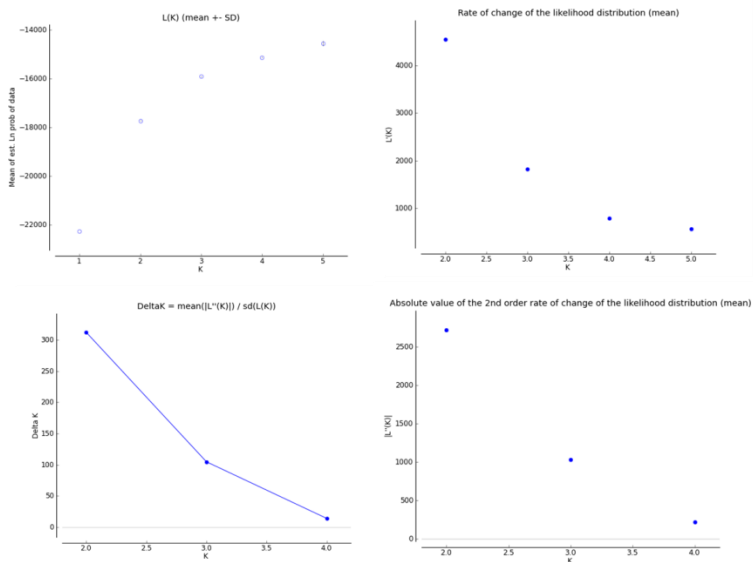

Supplementary Figure S3: A) Bar plot output from STRUCTURE; B) Likelihoods calculated from STRUCTURE outputs, using Harvester (<http://taylor0.biology.ucla.edu/structureHarvester/>) (Pritchard, et al. 2000).

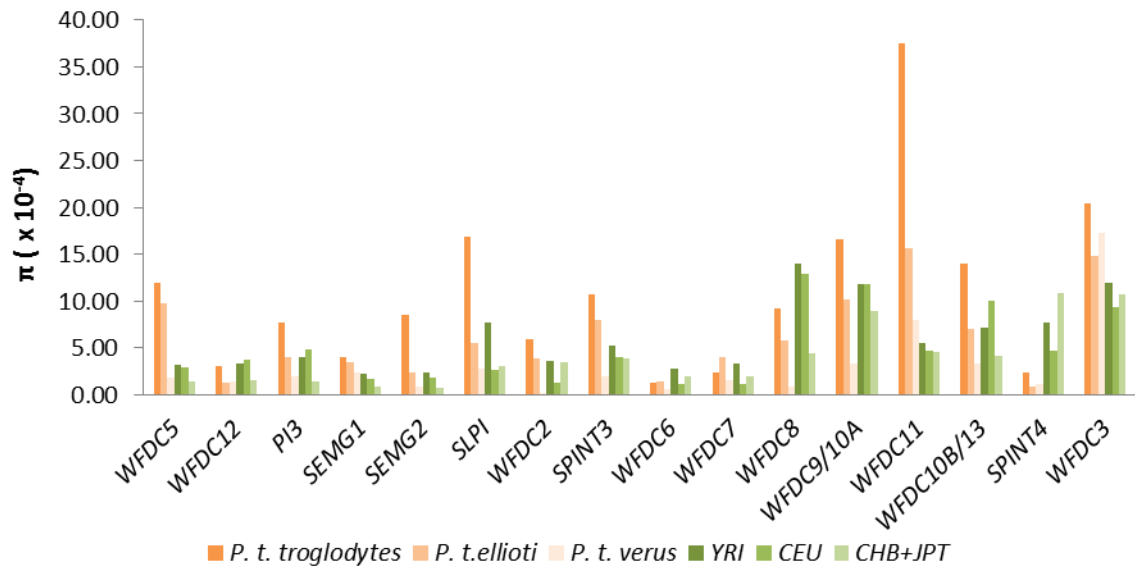

Supplementary Figure S4: Distribution of nucleotide diversity for all the *WFDC* genes in the sequenced chimpanzee subspecies and the corresponding regions in the 1000 genomes database (The 1000 Genomes Project Consortium 2010).

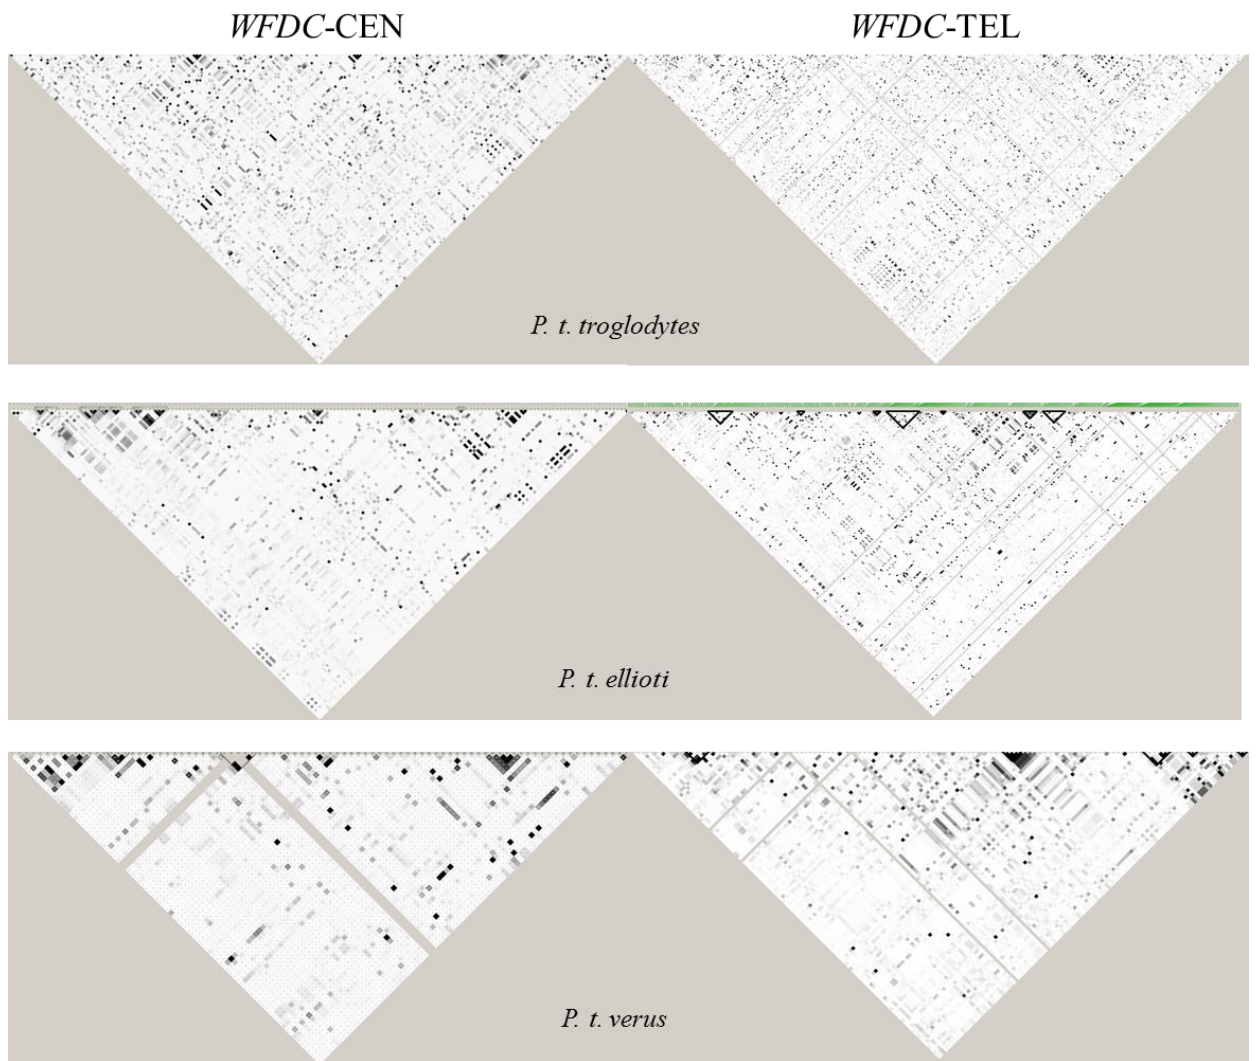

Supplementary Figure S5: LD plots from Haploview ( $r^2$ ) (Barrett 2009; Barrett, et al. 2005).

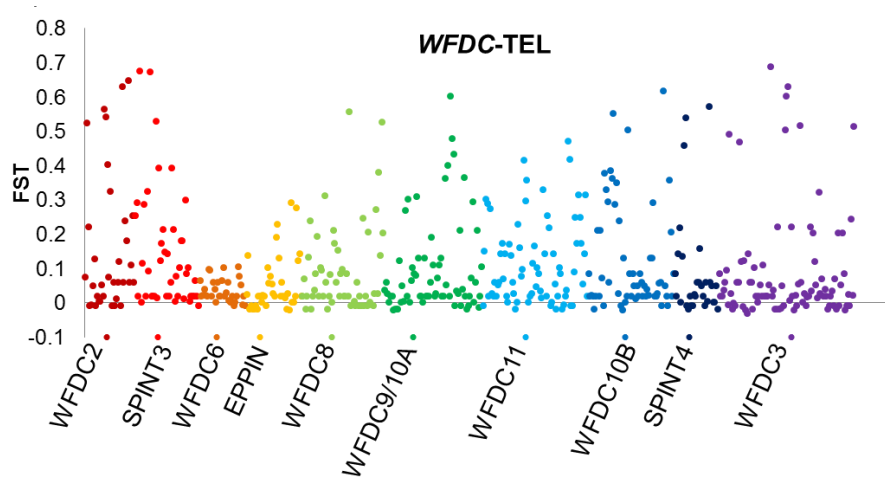

Supplementary Figure S6:  $F_{ST}$  values for all the populations, plotted based on genomic position (Excoffier 2002).

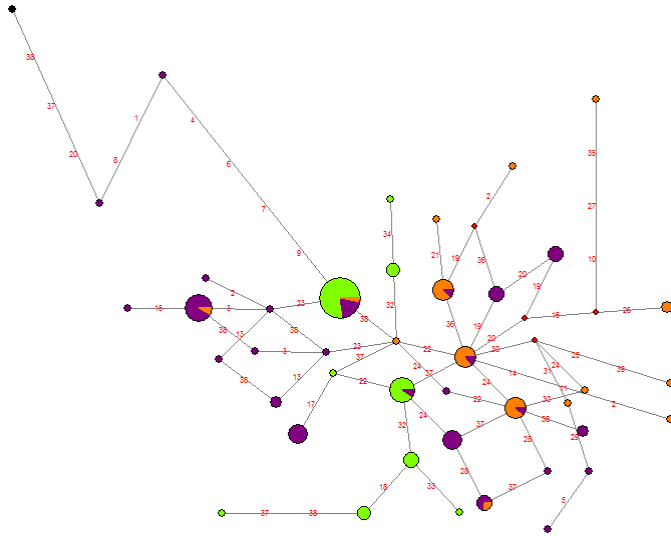

Supplementary Figure S7: Inferred network haplotypes at the *EPPIN*. Each circle represents a unique haplotype, and its area is proportional to its frequency. Within each circle, *P. t. verus*, *P. t. ellioti*, and *P. t. troglodytes* are labeled in green, purple and orange, respectively. The mutations that differentiate each haplotype are shown along each branch. (Bandelt, et al. 1999).



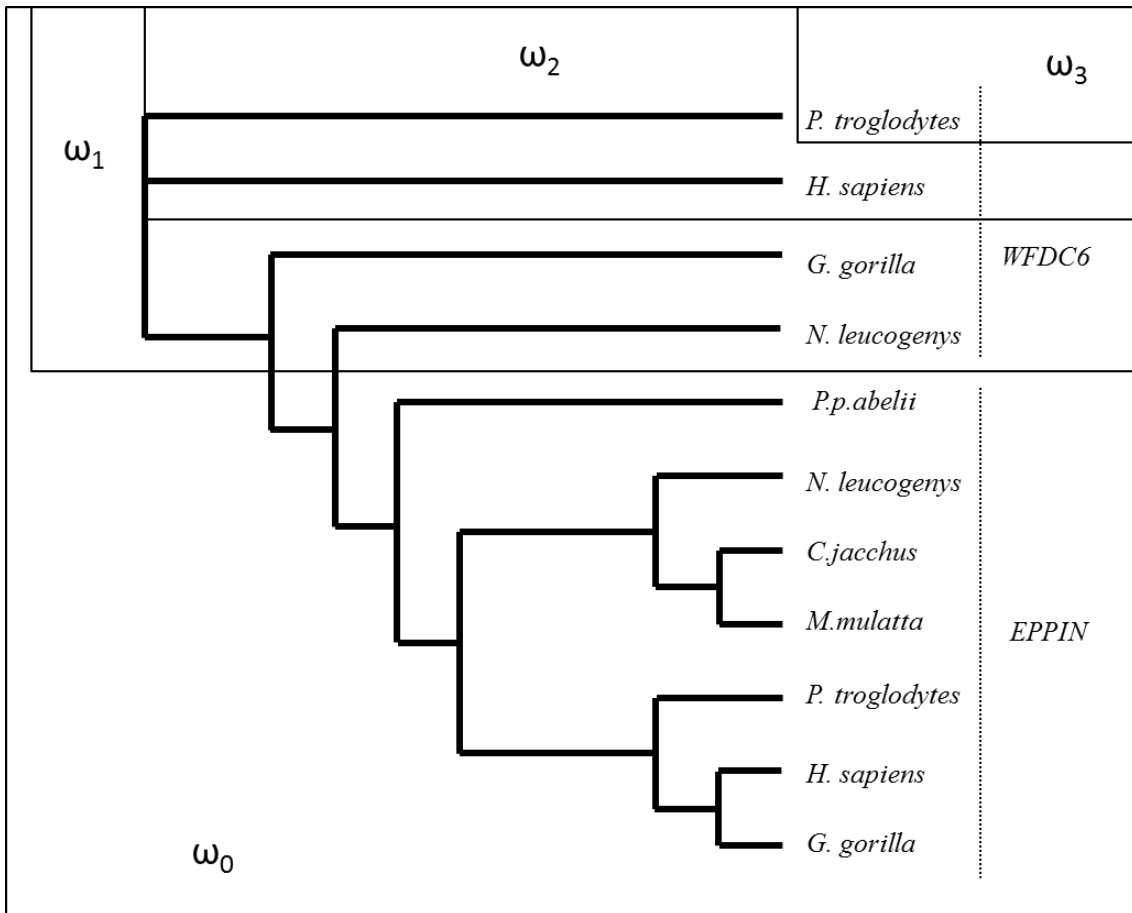

Supplementary Figure S8: Phylogenetic analysis of *WFDC6* and *EPPIN* in primates, showing  $d_N/d_S$  ratios. The different branch models are represented as follows:  $\omega_0$ , one ratio model;  $\omega_1$ , two-ratio model;  $\omega_2$  the three-ratio model 1; and  $\omega_3$  the three-ratio model 2.

## Supplementary Figures References

- Bandelt HJ, Forster P, Rohl A 1999. Median-joining networks for inferring intraspecific phylogenies. *Molecular Biology and Evolution* 16: 37-48.
- Barrett JC 2009. Haploview: Visualization and analysis of SNP genotype data. *Cold Spring Harbor protocols* 2009: pdb ip71. doi: 10.1101/pdb.ip71
- Barrett JC, Fry B, Maller J, Daly MJ 2005. Haploview: analysis and visualization of LD and haplotype maps. *Bioinformatics* 21: 263-265. doi: 10.1093/bioinformatics/bth457
- Excoffier L 2002. Human demographic history: refining the recent African origin model. *Current opinion in genetics & development* 12: 8.
- Gonder MK, et al. 2011. Evidence from Cameroon reveals differences in the genetic structure and histories of chimpanzee populations. *PNAS* 108: 12.
- Patterson N, Price AL, Reich D 2006. Population structure and eigenanalysis. *PLoS Genetics* 2: e190. doi: 10.1371/journal.pgen.0020190
- Pritchard JK, Stephens M, Donnelly P 2000. Inference of Population Structure Using Multilocus Genotype Data. *Genetics* 155: 14.
- The 1000 Genomes Project Consortium 2010. A map of human genome variation from population-scale sequencing. *Nature* 467: 1061-1073. doi: 10.1038/nature09534
