# Supplementary material
Source: PubMed Central journal article supplement (PMC3879984)
Supplement: supp_evt198_Ferreira_Chimps_GBE_STables_FINAL.pdf [file supp_evt198_Ferreira_Chimps_GBE_STables_FINAL.pdf]

Sequence diversity of *Pan troglodytes* subspecies and the impact of *WFDC6* selective constraints in reproductive immunity.

Zélia Ferreira, Belen Hurle, Aida M. Andrés, Warren Kretzschmar, Jim Mullikin, Praveen Cherukuri, Pedro Cruz, Mary Katherine Gonder, Anne Stone, Sarah Tishkoff, Willie Swanson, NISC Comparative Sequencing Program, Eric Green, Andrew G. Clark, and Susana Seixas

Supplementary Tables

**Supplementary Table S1: Samples sequenced.**

| <b>Population</b>                          | <b>Sample numbers</b> |            |             |           |          |        |               |
|--------------------------------------------|-----------------------|------------|-------------|-----------|----------|--------|---------------|
| <i>Pan troglodytes troglodytes</i><br>(15) | Etrange               | Ewake      |             | Kita      | Mac      | Maya   | Mokolo Nanga- |
|                                            | Eboko                 | Nikita     | Papaie      | Pauldina  | Pecos    | Silva  | Suzanne       |
|                                            |                       | Lada       | Jules       |           |          |        |               |
| <i>Pan troglodytes ellioti</i><br>(31)     | Achidi                |            | Akwaya-Jean | Alex      | Bally    | Bankim | Basho         |
|                                            |                       | Bernadette |             | Carlos    | Eve      | Gah    | George Jack   |
|                                            |                       | Jacob      | Julie       | Kopongo   |          | Louisa | Margaret      |
|                                            |                       | Mesange    |             | Nemo      | Nicolene |        | Papa Paquita  |
|                                            |                       | TKC        | Taweh       | Tinto-Mbu |          | Tobi   | Bana Bergkamp |
|                                            |                       | Koto       | Damian      |           | Banyo    |        |               |
| <i>Pan troglodytes verus</i><br>(22)       | Pt100                 | Pt101      | Pt102       | Pt103     | Pt104    | Pt105  | Pt106         |
|                                            | Pt107                 | Pt112      | Pt115       | Pt117     | Pt120    | Pt121  | Pt122         |
|                                            | Pt124                 | Pt125      | Pt126       | Pt81      | Pt87     | Pt88   | Pt97          |
|                                            | Pt98                  |            |             |           |          |        |               |

**Supplementary Table S2:** Regions of the genome sequenced.

| Chr 20 coordinates*   | Gene                                                  |
|-----------------------|-------------------------------------------------------|
| <i>WFDC-CEN</i>       |                                                       |
| 43,171,507-43,177,217 | <i>WFDC5</i> (WAP four-disulfide core domain 5)       |
| 43,185,481-43,186,520 | <i>WFDC12</i> (WAP four-disulfide core domain 12)     |
| 43,236,912-43,238,599 | <i>PI3</i> (elafin)                                   |
| 43,269,088-43,271,823 | <i>SEMG1</i> (semenogelin 1)                          |
| 43,269,088-43,286,513 | <i>SEMG2</i> (semenogelin 2)                          |
| 43,314,293-43,316,620 | <i>SLPI</i> (secretory leukocyte peptidase inhibitor) |
| <i>WFDC-TEL</i>       |                                                       |
| 43,541,899-43,543,586 | <i>WFDC2</i> (WAP four-disulfide core domain 2)       |
| 43,574,515-43,577,678 | <i>SPINT3</i>                                         |
| 43,596,250-43,601,548 | <i>WFDC6</i> (WAP four-disulfide core domain 6)       |
| 43,602,679-43,609,442 | <i>SPINLWI</i> (WAP four-disulfide core domain 7)     |
| 43,613,815-43,641,379 | <i>WFDC8</i> (WAP four-disulfide core domain 8)       |
| 43,669,992-43,693,321 | <i>WFDC9</i> (WAP four-disulfide core domain 9)       |
| 43,691,799-43,693,245 | <i>WFDC10a</i> (WAP four-disulfide core domain 10a)   |
| 43,710,616-43,732,292 | <i>WFDC11</i> (WAP four-disulfide core domain 11)     |
| 43,746,704-43,767,072 | <i>WFDC10b</i> (WAP four-disulfide core domain 10b)   |
| 43,764,069-43,770,870 | <i>WFDC13</i> (WAP four-disulfide core domain 13)     |
| 43,784,402-43,787,749 | <i>SPINT4</i>                                         |
| 43,836,254-43,853,954 | <i>WFDC3</i> (WAP four-disulfide core domain 3)       |

#Control Regions (Andrés, et al. 2010)

| Pseudogene ID     | Chromosome coordinate    | Gene and chr of origin | Processed Pseudogenes per genome |            |           |        |
|-------------------|--------------------------|------------------------|----------------------------------|------------|-----------|--------|
|                   |                          |                        | Human                            | Chimpanzee | Orangutan | Rhesus |
| ENCODE            |                          |                        |                                  |            |           |        |
| Pseudogene:79794  | chr11:5505093-5505962    | Unknown                | 1                                | 1          | 1         | 1      |
| NON-ENCODE        |                          |                        |                                  |            |           |        |
| Pseudogene:89     | chr1:38020719-38021144   | C14ORF138 @ Chr14      | 1                                | 1          | 1         | 0      |
| Pseudogene:127271 | chr1:224666087-224666538 | Unknown                | 1                                | 3          | 2         | 4      |
| Pseudogene:511    | chr1:181191136-181191557 | NCR1 @ Chr19           | 1                                | 1          | 1         | 1      |
| Pseudogene:716    | chr1:245414326-245414818 | PEX5 @ Chr12           | 1                                | 1          | 1         | 1      |
| Pseudogene:189    | chr1:61892410-61893166   | SPR @ Chr2             | 1                                | 1          | 1         | 1      |
| Pseudogene:414    | chr1:156412265-156414162 | ELL2 @ Chr5            | 3                                | 3          | 3         | 3      |

|                   |                           |          |   |       |   |           |           |           |
|-------------------|---------------------------|----------|---|-------|---|-----------|-----------|-----------|
| Pseudogene:725    | chr2:7794021-7794677      | PSMB1    | @ | Chr6  | 1 | 1         | ORF       | 2?        |
| Pseudogene:881    | chr2:76338812-76339387    | NP       | @ | Chr14 | 1 | 1         | 1         | 1 + ORF   |
| Pseudogene:919    | chr2:101503725-101504888  | PRCP     | @ | Chr11 | 1 | 1         | 1         | 1         |
| Pseudogene:10377  | chr2:146951393-146952148  | Unknown  |   |       | 1 | 1         | 1         | 1         |
| Pseudogene:10800  | chr2:158526147-158527646  | MTA3     | @ | Chr2  | 1 | 1         | 1         | ND        |
| Pseudogene:1317   | chr3:34889168-34890350    | FECH     | @ | Chr18 | 1 | 1         | 1         | 1         |
| Pseudogene:1390   | chr3:59496630-59497181    | Unknown  |   |       | 2 | 2         | 2         | 2         |
| Pseudogene:131502 | chr3:81498830-81499811    | Unknown  |   |       | 1 | 1         | 1         | ND        |
| Pseudogene:1588   | chr3:146885050-146885571  | GM2A     | @ | Chr5  | 2 | 2         | 2         | 2         |
| Pseudogene:75498  | chr4:36184061-36186883    | FBXO38   | @ | Chr5  | 1 | 1         | 1         | 1         |
| Pseudogene:1886   | chr4:89667737-89668341    | CD53     | @ | Chr1  | 1 | 1         | 1         | 1         |
| Pseudogene:18262  | chr4:176732748-176734338  | ADAM29   | @ | Chr4  | 2 | 2         | 2         | 2         |
| Pseudogene:1835   | chr4:68730627-68731081    | Unknown  |   |       | 1 | 1         | 1         | 1         |
| Pseudogene:2117   | chr5:29141432-29142101    | C14ORF45 | @ | Chr14 | 1 | 1         | 1         | 1         |
| Pseudogene:19453  | chr5:133084092-133084524  | DPH4     | @ | Chr11 | 1 | 1         | 1         | 1         |
| Pseudogene:2934   | chr6:139701013-139702410  | DNAJC7   | @ | Chr17 | 2 | 2         | 2         | 3         |
| Pseudogene:3153   | chr7:55279435-55280868    | SLC19A3  | @ | Chr2  | 2 | 2         | 2         | 2         |
| Pseudogene:20740  | chr7:128120741-128121217  | IMP3     | @ | Chr15 | 2 | 2         | 2         | 2         |
| Pseudogene:3607   | chr8:60632574-60632998    | NUDT15   | @ | Chr13 | 2 | 2 + 1 ORF | 2         | 2         |
| Pseudogene:3693   | chr8:97208019-97209206    | Unknown  |   |       | 1 | 1         | 1         | 1         |
| Pseudogene:69522  | chr9:6185935-6186853      | GTF3A    | @ | Chr13 | 5 | 5         | 5         | 5         |
| Pseudogene:21854  | chr9:21685170-21686842    | KHSRP    | @ | Chr19 | 1 | 1         | 1         | 1         |
| Pseudogene:4067   | chr9:106130426-106131316  | WDR45L   | @ | Chr17 | 3 | 2 + 1 ORF | 2 + 1 ORF | 2         |
| Pseudogene:4320   | chr10:79498396-79499304   | GNAI2    | @ | Chr3  | 3 | 3         | 2         | 1         |
| Pseudogene:4547   | chr11:40061840-40062643   | ZCCHC9   | @ | Chr5  | 3 | 2         | 3         | 3         |
| Pseudogene:4837   | chr11:113829007-113830057 | CCRN4L   | @ | Chr4  | 1 | 1         | 1         | 2         |
| Pseudogene:4765   | chr11:91708853-91709310   | NDUFB11  | @ | ChrX  | 1 | 1         | 1         | 1 + 1 ORF |
| Pseudogene:4913   | chr12:7650698-7651196     | CLTA     | @ | Chr9  | 2 | 2         | 2         | 2         |
| Pseudogene:5244   | chr12:107199014-107200142 | APOBEC3F | @ | Chr22 | 1 | 1         | 1         | 1         |
| Pseudogene:5055   | chr12:44124847-44125485   | MESDC2   | @ | Chr15 | 1 | 1         | 1         | 1         |
| Pseudogene:73106  | chr13:24217272-24218374   | IRX1     | @ | Chr5  | 1 | 1         | 1         | 1         |
| Pseudogene:5504   | chr13:89442087-89443147   | PEX12    | @ | Chr17 | 1 | 1         | 1         | 0         |
| Pseudogene:5477   | chr13:74300713-74302220   | RIOK3    | @ | Chr18 | 1 | 1         | 1         | 1         |
| Pseudogene:5700   | chr14:61368336-61368840   | COX4I1   | @ | Chr16 | 2 | 1         | 2         | 2 + 1 ORF |
| Pseudogene:62081  | chr14:88646206-88647320   | MPPE1    | @ | Chr18 | 2 | 1         | 1         | 1         |
| Pseudogene:6310   | chr16:82710324-82711542   | PLK-1    | @ | Chr16 | 2 | 2         | 2         | 2         |
| Pseudogene:6549   | chr17:66136577-66137001   | Unknown  |   |       | 1 | 1         | 1         | 1         |
| Pseudogene:26649  | chr19:18012148-18012866   | APOA1BP  | @ | Chr1  | 2 | 2         | 2         | 2         |
| Pseudogene:6997   | chr20:21429964-21430620   | GSTM3    | @ | Chr1  | 1 | 1         | 1         | 2         |
| Pseudogene:7045   | chr20:37391075-37391973   | ATG3     | @ | Chr3  | 1 | 2         | 1         | 1         |
| Pseudogene:7112   | chr21:15051781-15052541   | POLR2C   | @ | Chr16 | 1 | 1         | 1         | 1         |
| Pseudogene:7176   | chr21:45316169-45316649   | Unknown  |   |       | 1 | 1         | 1         | 1         |

\* Chromosome coordinates are based in the human march 2006 assembly (hg18; genome.ucsc.edu)

# These loci were selected using the following filters: Processed pseudogenes (according to the annotation in pseudogene.org); Minimum length of 400 bp; Unlinked to each other; ot OR, not

ribosomal RNA (according to the annotation in pseudogene.org); With human, orangutan and rhesus orthologues; No overlap with UCSC genes; No overlap with highly conserved regions (most conserved, UCSC); Average genome recombination rate; Processed pseudogenes in single copy in human and chimpanzee genomes were preferred. (When this was not possible, one pseudogene per family was accepted provided that the members of the family had 90% identity or less among them.)

**Supplementary Table S3:** Coding substitutions in *WFDC* genes.

## a) Nonsynonymous substitutions

| SNP location       | Protein | Frequency | Expected | Found   | Expected | Found | SIFT<br>(Kumar, et al. 2009) | PolyPhen<br>(Adzhubei, et al. 2010) |
|--------------------|---------|-----------|----------|---------|----------|-------|------------------------------|-------------------------------------|
| in chr20 (Pantro2) |         |           | Residue  | Residue | Codon    | Codon |                              |                                     |
| 42453065           | WFDC5   | 0.06      | R        | H       | CGC      | CAC   | Tolerated                    | Benign                              |
| 42453208           | WFDC5   | 0.04      | V        | I       | GTC      | ATC   | Tolerated                    | Possibly Damaging                   |
| 42453271           | WFDC5   | 0.02      | V        | M       | GTG      | ATG   | Tolerated                    | Possibly Damaging                   |
| 42466176           | WFDC12  | 0.04      | W        | R       | TGG      | CGG   | Damaging                     | Benign                              |
| 42466200           | WFDC12  | 0.04      | S        | P       | TCA      | CCA   | Damaging                     | Benign                              |
| 42466206           | WFDC12  | 0.04      | D        | H       | GAT      | CAT   | Damaging                     | Probably Damaging                   |
| 42466400           | WFDC12  | 0.01      | K        | N       | AAG      | AAT   | Tolerated                    | Probably Damaging                   |
| 42466463           | WFDC12  | 0.02      | D        | E       | GAC      | GAA   | Tolerated                    | Probably Damaging                   |
| 42466492           | WFDC12  | 0.02      | D        | N       | GAT      | AAT   | Tolerated                    | Benign                              |
| 42466510           | WFDC12  | 0.04      | V        | I       | GTA      | ATA   | Tolerated                    | Benign                              |
| 42519166           | PI3     | 0.02      | T        | M       | ACG      | ATG   | Tolerated                    | Benign                              |
| 42520083           | PI3     | 0.12      | V        | I       | GTT      | ATT   | Tolerated                    | Possibly Damaging                   |
| 42568115           | SEMG2   | 0.02      | G        | D       | GGT      | GAT   | Affect Protein Function      | Probably Damaging                   |
| 42568172           | SEMG2   | 0.05      | G        | V       | GGC      | GTC   | Tolerated                    | Possibly Damaging                   |
| 42568204           | SEMG2   | 0.02      | H        | D       | CAT      | GAT   | Tolerated                    | Benign                              |
| 42568441           | SEMG2   | 0.02      | A        | T       | GCT      | ACT   | Tolerated                    | Possibly Damaging                   |
| 42568613           | SEMG2   | 0.01      | S        | N       | AGC      | AAC   | Tolerated                    | Possibly Damaging                   |
| 42568780           | SEMG2   | 0.01      | H        | Y       | CAT      | TAT   | Tolerated                    | Probably Damaging                   |
| 42568831           | SEMG2   | 0.02      | K        | E       | AAG      | GAG   | Tolerated                    | Probably Damaging                   |
| 42568883           | SEMG2   | 0.02      | K        | M       | AAG      | ATG   | Tolerated                    | Probably Damaging                   |
| 42568888           | SEMG2   | 0.02      | H        | Y       | CAT      | TAT   | Tolerated                    | Probably Damaging                   |
| 42569052           | SEMG2   | 0.01      | E        | D       | GAG      | GAT   | Tolerated                    | Probably Damaging                   |
| 42569213           | SEMG2   | 0.07      | I        | T       | ATT      | ACT   | Tolerated                    | Benign                              |
| 42569468           | SEMG2   | 0.02      | R        | P       | CGA      | CCA   | Tolerated                    | Probably Damaging                   |
| 42569698           | SEMG2   | 0.02      | H        | Y       | CAT      | TAT   | Tolerated                    | Benign                              |
| 42826868           | WFDC2   | 0.02      | S        | L       | TCG      | TTG   | Tolerated                    | Possibly Damaging                   |
| 42826905           | WFDC2   | 0.04      | S        | R       | AGC      | AGG   | Tolerated                    | Benign                              |
| 42897365           | WFDC6   | 0.01      | C        | R       | TGT      | CGT   | Tolerated                    | Probably Damaging                   |
| 42897376           | WFDC6   | 0.02      | R        | H       | CGT      | CAT   | Tolerated                    | Benign                              |
| 42897403           | WFDC6   | 0.03      | E        | G       | GAA      | GGA   | Tolerated                    | Benign                              |
| 42897449           | WFDC6   | 0.01      | E        | K       | GAA      | AAA   | Tolerated                    | Benign                              |
| 42897457           | WFDC6   | 0.07      | V        | G       | GTG      | GGG   | Tolerated                    | Probably Damaging                   |
| 42898710           | WFDC6   | 0.01      | I        | V       | ATC      | GTC   | Tolerated                    | Benign                              |
| 42972808           | WFDC9   | 0.03      | I        | T       | ATT      | ACT   | Tolerated                    | Affect Protein Function             |
| 42992587           | WFDC10A | 0.09      | T        | P       | ACT      | CCT   | Affect Protein Function      | Benign                              |

|          |         |      |   |   |     |     |                                            |                                |
|----------|---------|------|---|---|-----|-----|--------------------------------------------|--------------------------------|
| 42992632 | WFDC10A | 0.01 | Q | K | CAG | AAG | Tolerated<br>Affect<br>Protein<br>Function | Possibly<br>Damaging           |
| 42993698 | WFDC10A | 0.01 | C | R | TGT | CGT |                                            | Probably<br>Damaging           |
| 43044472 | WFDC10B | 0.01 | C | * | TGT | TGA |                                            |                                |
| 43044552 | WFDC10B | 0.02 | L | V | CTA | GTA | Tolerated<br>Affect<br>Protein<br>Function | Benign                         |
| 43044585 | WFDC10B | 0.01 | I | V | ATC | GTC |                                            | Benign<br>Possibly<br>Damaging |
| 43045539 | WFDC10B | 0.07 | R | C | CGT | TGT | Tolerated                                  |                                |
| 43045602 | WFDC10B | 0.08 | P | T | CCC | ACC | Tolerated<br>Affect<br>Protein<br>Function | Benign                         |
| 43071581 | WFDC10B | 0.02 | R | T | AGG | ACG |                                            | Probably<br>Damaging           |
| 43142946 | WFDC3   | 0.01 | E | K | GAA | AAA | Tolerated                                  | Benign                         |
| 43142988 | WFDC3   | 0.02 | K | E | AAA | GAA | Tolerated<br>Affect<br>Protein<br>Function | Benign                         |
| 43143039 | WFDC3   | 0.02 | C | S | TGT | AGT |                                            | Probably<br>Damaging           |
| 43155352 | WFDC3   | 0.44 | S | F | TCT | TTT | Tolerated                                  | Benign                         |
| 43155425 | WFDC3   | 0.45 | T | P | ACT | CCT | Tolerated                                  | Benign                         |
| 43155466 | WFDC3   | 0.20 | P | L | CCT | CTT | Tolerated<br>Affect<br>Protein<br>Function | Benign                         |
| 43155467 | WFDC3   | 0.03 | P | S | CCT | TCT |                                            | Benign                         |

b) Non-synonymous chimpanzee specific fixed differences

| Protein    | Position | Human | Chimp | Orang | Macaque | SIFT (Kumar, et al. 2009) | PolyPhen (Adzhubei, et al. 2010) |
|------------|----------|-------|-------|-------|---------|---------------------------|----------------------------------|
| WFDC12     | G27D     | C     | T     | C     | C       | Tolerated                 | Benign                           |
| SEMG2      | A93V     | C     | T     | C     | C       | Tolerated                 | Benign                           |
| SEMG2      | G101D    | G     | A     | G     | G       | Tolerated                 | Benign                           |
| SEMG2      | K120E    | A     | G     | A     | A       | Tolerated                 | Benign                           |
| SEMG2      | H136Y    | C     | T     | C     | C       | Tolerated                 | Benign                           |
| SEMG2      | S232G    | A     | G     | A     | A       | Tolerated                 | Benign                           |
| SEMG2      | H401R    | A     | G     | A     | A       | Tolerated                 | Benign                           |
| SEMG2      | H461R    | A     | G     | A     | A       | Tolerated                 | Benign                           |
| SEMG2      | T485S    | A     | T     | A     | A       | Affect Protein Function   | Benign                           |
| SEMG2      | G504D    | G     | A     | G     | G       | Tolerated                 | Benign                           |
| SLPI       | L13F     | G     | A     | G     | G       | Tolerated                 | Benign                           |
| WFDC6      | P34S     | G     | A     | G     | G       | Tolerated                 | Benign                           |
| EPPIN      | K79E     |       |       |       |         | Affect Protein Function   |                                  |
| WFDC8      | L207P    | A     | G     | ?     | A       | Tolerated                 | Benign                           |
| WFDC8      | D64E     | G     | T     | G     | A       | Tolerated                 | Benign                           |
| WFDC8      | S30C     | G     | C     | G     | G       | Tolerated                 | Benign                           |
| WFDC9      | F31L     | A     | G     | A     | T       | Tolerated                 | Benign                           |
| WFDC10B/13 | L16S     | A     | G     | A     | A       | Tolerated                 | Benign                           |

c) Synonymous substitutions for the *WFDC* genes.

| SNP location | Protein | Frequency | Residue | Expected | Found |
|--------------|---------|-----------|---------|----------|-------|
|--------------|---------|-----------|---------|----------|-------|

| in chr20 (Pantro2) |         |      |   | Codon | Codon |
|--------------------|---------|------|---|-------|-------|
| 42452973           | WFDC5   | 0.44 | R | CGG   | AGG   |
| 42452992           | WFDC5   | 0.45 | S | AGC   | AGT   |
| 42453007           | WFDC5   | 0.2  | K | AAG   | AAA   |
| 42453097           | WFDC5   | 0.02 | V | GTG   | GTA   |
| 42453292           | WFDC5   | 0.21 | L | CTA   | TTA   |
| 42466156           | WFDC12  | 0.45 | G | GGC   | GGT   |
| 42466499           | WFDC12  | 0.14 | F | TTC   | TTT   |
| 42520145           | PI3     | 0.02 | G | GGT   | GGA   |
| 42569232           | SEMG2   | 0.13 | E | GAG   | GAA   |
| 42569682           | SEMG2   | 0.02 | Q | CAG   | CAA   |
| 42826908           | WFDC2   | 0.05 | A | GCG   | GCC   |
| 42836863           | WFDC2   | 0.03 | L | CTC   | CTT   |
| 42921553           | WFDC8   | 0.12 | S | AGC   | AGT   |
| 42993772           | WFDC10A | 0.01 | I | ATC   | ATT   |
| 43010530           | WFDC11  | 0.02 | T | ACC   | ACT   |
| 43010584           | WFDC11  | 0.01 | R | AGG   | AGA   |
| 43071581           | WFDC13  | 0.02 | S | TCC   | TCG   |
| 43072457           | WFDC10B | 0.05 | S | AGC   | AGT   |
| 43156519           | WFDC3   | 0.01 | L | CTG   | CTA   |
| 43156543           | WFDC3   | 0.09 | P | CCC   | CCT   |

**Supplementary Table S.4:** 2.5 percentile resulting from 100000 coalescent simulations using ms, under three demographic models (Hudson 2002).

| Gene              | Sub-species            | S  | $\pi$ ( $10^{-4}$ ) | Length | $\Theta_w$ | Tajima's <i>D</i> | Fu & Li <i>D</i> * | Fay and Wu's <i>H</i> | P(HKA) |
|-------------------|------------------------|----|---------------------|--------|------------|-------------------|--------------------|-----------------------|--------|
| <i>WFDC5</i>      | <i>Pan troglodytes</i> | 45 | 7.7796              | 5536   | 8.25       | -0.1739           | -0.1817            | 1.4109                | 0.6746 |
| <i>WFDC12</i>     | <i>Pan troglodytes</i> | 24 | 2.4808              | 1323   | 4.39       | -1.2459           | -1.0808            | 0.7227                | 0.6637 |
| <i>PI3</i>        | <i>Pan troglodytes</i> | 32 | 4.3176              | 3377   | 5.85       | -0.7764           | -0.3782            | 6.5226                | 0.4454 |
| <i>SEMG1</i>      | <i>Pan troglodytes</i> | 45 | 3.9938              | 3305   | 8.2        | -1.5677           | 0.3357             | -1.0394               | 0.1462 |
| <i>SEMG2</i>      | <i>Pan troglodytes</i> | 47 | 3.5766              | 4324   | 8.57       | -1.7859           | -0.352             | 5.0682                | 0.8163 |
| <i>SLPI</i>       | <i>Pan troglodytes</i> | 46 | 6.6832              | 4709   | 8.38       | -0.6211           | 0.6394             | 7.6619                | 0.247  |
| <i>WFDC2</i>      | <i>Pan troglodytes</i> | 34 | 5.3535              | 3984   | 6.2        | -0.4058           | -0.2482            | 0.656                 | 0.1038 |
| <i>SPINT3</i>     | <i>Pan troglodytes</i> | 44 | 5.2971              | 3727   | 8.04       | -1.0425           | -1.5881            | 36.879                | 0.0084 |
| <i>WFDC6</i>      | <i>Pan troglodytes</i> | 31 | 1.6333              | 2807   | 5.67       | -2.1039           | -2.8978            | -1.5222               | 0.0131 |
| <i>WFDC7</i>      | <i>Pan troglodytes</i> | 38 | 3.165               | 3233   | 6.96       | -1.648            | -2.0926            | 16.8892               | 0.0175 |
| <i>WFDC8</i>      | <i>Pan troglodytes</i> | 56 | 4.8159              | 7179   | 10.2       | -1.6397           | -2.1769            | 6.131                 | 0.1153 |
| <i>WFDC9/10A</i>  | <i>Pan troglodytes</i> | 67 | 7.2409              | 6863   | 12.2       | -1.2844           | -1.8648            | 19.3656               | 0.3861 |
| <i>WFDC11</i>     | <i>Pan troglodytes</i> | 71 | 10.094              | 5037   | 13         | -0.7082           | -0.5289            | 25.782                | 0.0145 |
| <i>WFDC10B/13</i> | <i>Pan troglodytes</i> | 59 | 6.8495              | 7365   | 10.8       | -1.1309           | -1.54              | -4.1285               | 0.1052 |
| <i>SPINT4</i>     | <i>Pan troglodytes</i> | 30 | 2.2099              | 3527   | 5.5        | -1.7644           | -1.9467            | 16.0833               | 0.1734 |
| <i>WFDC3</i>      | <i>Pan troglodytes</i> | 93 | 10.64               | 7572   | 17         | -1.1874           | -1.0211            | 17.8464               | 0.0719 |



**Supplementary Table S.5:** Parameter Estimates and Likelihood Scores under Different Branch models (Yang 1997; Zhang, et al. 2005).

|                     | <b>Parameters for Branches</b>             | <b>Likelihoods</b> |
|---------------------|--------------------------------------------|--------------------|
| <b>One ratio</b>    | $\omega_{\text{EPPIN-WFDC6}} = 0.4739$     | -1388.2014         |
| <b>Two ratios</b>   | $\omega_{\text{EPPIN}} = 0.4738$           | -1387.6820         |
|                     | $\omega_{\text{WFDC6}} = 0.7782$           |                    |
| <b>Three ratios</b> | $\omega_{\text{EPPIN}} = 0.4739$           | -1387.5959         |
|                     | $\omega_{\text{WFDC6others}} = 0.7091$     |                    |
|                     | $\omega_{\text{WFDC6ancHomoPan}} = 1.1656$ |                    |
| <b>Three ratios</b> | $\omega_{\text{EPPIN}} = 0.4738$           | -1387.6534         |
|                     | $\omega_{\text{WFDC6 others}} = 0.8119$    |                    |
|                     | $\omega_{\text{WFDC6Pan}} = 0.5891$        |                    |

## Supplementary Tables References

- Adzhubei IA, et al. 2010. A method and server for predicting damaging missense mutations. *Nature methods* 7: 248-249. doi: 10.1038/nmeth0410-248
- Andrés AM, et al. 2010. Balancing selection maintains a form of ERAP2 that undergoes nonsense-mediated decay and affects antigen presentation. *PLoS Genetics* 6: e1001157. doi: 10.1371/journal.pgen.1001157
- Fay JC, Wyckoff GJ, Wu C-I 2002. Testing the neutral theory of molecular evolution with genomic data from *Drosophila*. *Nature* 415: 3.
- Fu Y-X, Li W-H 1993. Statistical Tests of Neutrality of Mutations. *Genetics* 133: 15.
- Hudson RR 2002. Generating samples under a Wright-Fisher neutral model of genetic variation. *Bioinformatics* 18: 337-338.
- Hudson RR, Kreitman M, Aguadé M 1987. A Test of Neutral Molecular Evolution Based on Nucleotide Data. *Genetics* 116: 6.
- Kumar P, Henikoff S, Ng PC 2009. Predicting the effects of coding non-synonymous variants on protein function using the SIFT algorithm. *Nature Protocols* 4: 1073-1082. doi: DOI 10.1038/nprot.2009.86
- Tajima F 1989. Statistical method for testing the neutral mutation hypothesis by DNA polymorphism. *Genetics* 123: 585-595.
- Watterson GA 1975. On the number of segregating sites in genetical models without recombination. *Theor Popul Biol* 7: 256-276.
- Wegmann D, Excoffier L 2010. Bayesian inference of the demographic history of chimpanzees. *Molecular Biology and Evolution* 27: 1425-1435. doi: 10.1093/molbev/msq028
- Yang Z 1997. PAML: a program package for phylogenetic analysis by maximum likelihood. *Comput Appl Biosci* 13: 555-556.
- Zeng K, Fu YX, Shi S, Wu CI 2006. Statistical tests for detecting positive selection by utilizing high-frequency variants. *Genetics* 174: 1431-1439. doi: genetics.106.061432 [pii]
- 10.1534/genetics.106.061432
- Zhang J, Nielsen R, Yang Z 2005. Evaluation of an improved branch-site likelihood method for detecting positive selection at the molecular level. *Molecular Biology and Evolution* 22: 2472-2479. doi: 10.1093/molbev/msi237
